# Supplementary material
Source: Elsevier journal article supplement (https://publications.goettingen-research-online.de/bitstream/2/5526/4/mmc2.pdf)
Supplement: mmc2 [file mmc2.pdf]

## Section 1: Household identity

|                                               |                                                                                                         |                                                                      |
|-----------------------------------------------|---------------------------------------------------------------------------------------------------------|----------------------------------------------------------------------|
| 1.1) Interviewer name:                        | 1.2) Date of the interview:                                                                             | 1.3) Time of the interview:                                          |
| 1.4) Name of the interviewee:                 | 1.5) Is the interviewee the household head? 0= no, 1= yes <input style="width: 20px;" type="checkbox"/> |                                                                      |
| 1.6) Town:                                    | 1.7) Village:                                                                                           | 1.8) Hamlet:                                                         |
| 1.9) Longitude (N):                           | 1.10) Latitude (W):                                                                                     | 1.11) Altitude:                                                      |
| 1.12) Distance to the road (in walking min.): | 1.13) Distance from the town center to where you can reach by car (in min.):                            | 1.14) Distance from Marcala to where you can reach by car (in min.): |
| House address:                                |                                                                                                         |                                                                      |

## Section 2: Family information

Table 2.1) Who are the household members? (*Note: Include in the following table all the people that normally sleep under the same roof and regularly share the food. First write down the names of all the members and then fill out one row for each of them.*)

| C<br>o<br>d<br>e | Name<br>( <i>only the first name</i> ) | Relation<br>to the<br>head of<br>the<br>household<br>(a) | Sex:<br>0 = M<br>1 = F | Age? | Knows<br>how to<br>read and<br>write?<br>(0) No<br>(1) Yes | Maximum<br>level of<br>education<br>(b) | Until<br>which<br>grade? | Clothing<br>and<br>footwear<br>expenses<br>during the<br>last year<br>(Lmp. <sup>1</sup> ) (c) | Works<br>on the<br>farm?<br>(0) No<br>(1) Yes | <i>If he/she says yes:</i><br>On average, this person works on the<br>farm, how many... |                                      |                                         |
|------------------|----------------------------------------|----------------------------------------------------------|------------------------|------|------------------------------------------------------------|-----------------------------------------|--------------------------|------------------------------------------------------------------------------------------------|-----------------------------------------------|-----------------------------------------------------------------------------------------|--------------------------------------|-----------------------------------------|
|                  |                                        |                                                          |                        |      |                                                            |                                         |                          |                                                                                                |                                               | ...hours per<br>day?<br>(# of hours)                                                    | ...days per<br>month?<br>(# of days) | ...months per<br>year?<br>(# of months) |
| 1                |                                        |                                                          |                        |      |                                                            |                                         |                          |                                                                                                |                                               |                                                                                         |                                      |                                         |
| 2                |                                        |                                                          |                        |      |                                                            |                                         |                          |                                                                                                |                                               |                                                                                         |                                      |                                         |
| 3                |                                        |                                                          |                        |      |                                                            |                                         |                          |                                                                                                |                                               |                                                                                         |                                      |                                         |
| 4                |                                        |                                                          |                        |      |                                                            |                                         |                          |                                                                                                |                                               |                                                                                         |                                      |                                         |
| 5                |                                        |                                                          |                        |      |                                                            |                                         |                          |                                                                                                |                                               |                                                                                         |                                      |                                         |
| 6                |                                        |                                                          |                        |      |                                                            |                                         |                          |                                                                                                |                                               |                                                                                         |                                      |                                         |
| 7                |                                        |                                                          |                        |      |                                                            |                                         |                          |                                                                                                |                                               |                                                                                         |                                      |                                         |

- (a) (1) Household head (2) spouse (3) son/daughter (4) father or mother (5) grandchild (6) grandparent (7) other relative (8) other non relative  
 (b) (1) without schooling (2) uncompleted elementary (3) completed elementary (4) uncompleted secondary school (5) completed secondary school  
 (6) university or technical college  
 (c) In order to get a more exact measurement regarding the clothing and footwear expenses, it is preferable to ask in the presence of the wife. If the clothes are homemade (hand-sewn clothing), ask for the costs of all the materials (fabric, buttons, etc)

<sup>1</sup> Lempira: currency from Honduras

2.2) Does any family member temporarily migrate to work? 0 = no, 1 = yes (No → go to 2.3)

2.2a) Is it the head of the household? 0 = no, 1 = yes

2.3) Did any member of the family go to another country to work? 0 = no, 1 = yes (No → go to 2.4)

2.3a) Does he/she send you money on a regular basis? 0 = no, 1 = yes

2.4) How many years have you lived in this community? \_\_\_\_\_ Years

2.5) Did you inherit all or part of your land? 0 = no, 1 = yes

### **Section 3: Land use and plot characteristics**

3.1) How many manzanas<sup>2</sup> belong to the members of this household? \_\_\_\_\_ manzanas

Every time I ask you about the last agricultural year, this refers to the period from the planting in May last year until the end of the summer of this year, in other words, until now. This year's planting is not taken into account!

3.2) In the last agricultural year, how many manzanas did you have...

| 1. with crops? | 2. with pasture? | 3. fallow/ scrub? | 4. with forest? | 5. leased to someone else? | 6. other: <i>specify</i> : |
|----------------|------------------|-------------------|-----------------|----------------------------|----------------------------|
|                |                  |                   |                 |                            |                            |

*Control for the interviewer: 1.+2.+3.+4.+6 must be equal to 3.1*

3.3) Do you have a family kitchen garden (with some vegetables, fruits and medicinal plants for your own consumption)? 0 = no, 1 = yes (if No → go to 3.6)

3.3a) What is the area of the kitchen garden? \_\_\_\_\_ meters wide and \_\_\_\_\_ meters long.

3.4) On how many separate plots did the members of this household work during the last agricultural year (including leased plots)?

**3.5) Draw a picture of these plots together with the interviewee (here or on the other side of the page), and refer to the drawing to know what plot you are talking about. For better reference assign a number to each plot.**

\_\_\_\_\_

<sup>2</sup> Manzana: 1 manzana is equivalent to 0.7 hectares

Table 3.6) Now I am going to ask you what crops you have planted on each plot during the last agricultural year.

| Plot code | How many manzanas does the plot have? | Crop (a) | Is it organic (0) or conventional (1) production? | Pure stand (0) or intercropped (1) | <i>If it is intercropped:</i><br>With which other crop? | In what area? | Unit:<br>1 = mzas,<br>2 = tareas <sup>3</sup> ,<br>3 = cama <sup>4</sup> | <i>If it is cama:</i><br>How many meters X how many meters? |
|-----------|---------------------------------------|----------|---------------------------------------------------|------------------------------------|---------------------------------------------------------|---------------|--------------------------------------------------------------------------|-------------------------------------------------------------|
| 1         |                                       |          |                                                   |                                    |                                                         |               |                                                                          | X                                                           |
|           |                                       |          |                                                   |                                    |                                                         |               |                                                                          | X                                                           |
|           |                                       |          |                                                   |                                    |                                                         |               |                                                                          | X                                                           |
|           |                                       |          |                                                   |                                    |                                                         |               |                                                                          | X                                                           |
| 2         |                                       |          |                                                   |                                    |                                                         |               |                                                                          | X                                                           |
|           |                                       |          |                                                   |                                    |                                                         |               |                                                                          | X                                                           |
|           |                                       |          |                                                   |                                    |                                                         |               |                                                                          | X                                                           |
|           |                                       |          |                                                   |                                    |                                                         |               |                                                                          | X                                                           |
| 3         |                                       |          |                                                   |                                    |                                                         |               |                                                                          | X                                                           |
|           |                                       |          |                                                   |                                    |                                                         |               |                                                                          | X                                                           |
|           |                                       |          |                                                   |                                    |                                                         |               |                                                                          | X                                                           |
|           |                                       |          |                                                   |                                    |                                                         |               |                                                                          | X                                                           |
| 4         |                                       |          |                                                   |                                    |                                                         |               |                                                                          | X                                                           |
|           |                                       |          |                                                   |                                    |                                                         |               |                                                                          | X                                                           |
|           |                                       |          |                                                   |                                    |                                                         |               |                                                                          | X                                                           |
|           |                                       |          |                                                   |                                    |                                                         |               |                                                                          | X                                                           |
| 5         |                                       |          |                                                   |                                    |                                                         |               |                                                                          | X                                                           |
|           |                                       |          |                                                   |                                    |                                                         |               |                                                                          | X                                                           |
|           |                                       |          |                                                   |                                    |                                                         |               |                                                                          | X                                                           |
|           |                                       |          |                                                   |                                    |                                                         |               |                                                                          | X                                                           |
| 6         |                                       |          |                                                   |                                    |                                                         |               |                                                                          | X                                                           |
|           |                                       |          |                                                   |                                    |                                                         |               |                                                                          | X                                                           |
|           |                                       |          |                                                   |                                    |                                                         |               |                                                                          | X                                                           |

**(a) Crop code!**

<sup>3</sup> Tarea: 1 tarea is equivalent to 0.11 acres.

<sup>4</sup> Cama: is a cultivated area delimited by a fence, in which one crop is planted. It has a square or rectangle shape, its width usually doesn't exceed 1.2 meters and it varies in length.

Table 3.7) Characteristics of the agricultural plots:

| Plot code | The plot is:<br>1 = owned<br>2 = leased<br>3 = borrowed | <i>If it is owned:</i>                                                             | <i>If you lease:</i>                     | Distance to the house |                         | Who is responsible to work on this plot?<br>(a) | Who disposes of the money from this plot?<br>(a) | Since when has this plot been cultivated?<br>(years)<br>888 = don't know | Since when has your family worked on this plot?<br>(years) |
|-----------|---------------------------------------------------------|------------------------------------------------------------------------------------|------------------------------------------|-----------------------|-------------------------|-------------------------------------------------|--------------------------------------------------|--------------------------------------------------------------------------|------------------------------------------------------------|
|           |                                                         | Do you have title of property?<br>0 = no,<br>1 = yes, formal,<br>2 = yes, informal | For how many months is it leased to you? | in km                 | or in minutes (on foot) |                                                 |                                                  |                                                                          |                                                            |
|           |                                                         |                                                                                    |                                          |                       |                         |                                                 |                                                  |                                                                          |                                                            |
|           |                                                         |                                                                                    |                                          |                       |                         |                                                 |                                                  |                                                                          |                                                            |
|           |                                                         |                                                                                    |                                          |                       |                         |                                                 |                                                  |                                                                          |                                                            |
|           |                                                         |                                                                                    |                                          |                       |                         |                                                 |                                                  |                                                                          |                                                            |

(a) (1) household head, (2) the spouse of the household, (3) both, (4) the son/daughter, (5) someone else, (6) the whole family

Table 3.8) biophysical characteristics

| Plot code | Slope<br>( <i>show graphic!</i> ) | Access to irrigation<br>(a) | Is there a river that crosses or borders the plot?<br>(b) | Color of the soil<br>(c) | Texture of the soil<br>(d) | Are there many rocks?<br>(e) | Water infiltration<br>(f) | Soil depth<br>(g) | Organic matter<br>(1) scant<br>(2) regular<br>(3) plenty | Soil fertility<br>(h) | Do you have many pests in this farm?<br>(b) | Do you have many weeds?<br>(b) | Does the soil wash off a lot?<br>(b) |
|-----------|-----------------------------------|-----------------------------|-----------------------------------------------------------|--------------------------|----------------------------|------------------------------|---------------------------|-------------------|----------------------------------------------------------|-----------------------|---------------------------------------------|--------------------------------|--------------------------------------|
|           |                                   |                             |                                                           |                          |                            |                              |                           |                   |                                                          |                       |                                             |                                |                                      |
|           |                                   |                             |                                                           |                          |                            |                              |                           |                   |                                                          |                       |                                             |                                |                                      |
|           |                                   |                             |                                                           |                          |                            |                              |                           |                   |                                                          |                       |                                             |                                |                                      |
|           |                                   |                             |                                                           |                          |                            |                              |                           |                   |                                                          |                       |                                             |                                |                                      |

(a) 1 = without irrigation, 2 = gravity irrigation, 3 = sprinkler irrigation, 4 = drip irrigation

(b) 0 = no, 1 = yes

(c) 1 = black, 2 = dark brown, 3 = light brown, 4 = red-brown, 5 = red, 6 = yellow, 7 = grey, 9 = other (specify)

(d) 1 = clay soil, 2 = clay loam, 3 = sandy

(e) 1 = few, 2 = more or less, 3 = many

(f) 1 = very low, puddles are formed, 2 = good, the water penetrates and is retained, 3 = very high, the soil dries out quickly

(g) 1 = deep, 2 = more or less, 3 = superficial

(h) 1 = very low, 2 = low, 3 = regular, 4 = high, 5 = very high

**Section 4: Soil conservation**

Table 4.1) Do you use or **have ever used** the following soil conservation practices?

*(First read all the different practices and then indicate if you use /have used them, then fill out a row for each practice you use/ have used )*

| Code |                           | 0 = no,<br>1 = yes | How many...?<br>(in the last agricultural year) | Unit     | Indicate the plots on which you implemented the practice <i>(use the drawing and write the codes)</i> | Indicate the plots on which you <b>previously used</b> the practice but not anymore <i>(write the plot codes)</i> | If you abandoned it:                                  |                                                                                                 |
|------|---------------------------|--------------------|-------------------------------------------------|----------|-------------------------------------------------------------------------------------------------------|-------------------------------------------------------------------------------------------------------------------|-------------------------------------------------------|-------------------------------------------------------------------------------------------------|
|      |                           |                    |                                                 |          |                                                                                                       |                                                                                                                   | Do you think of using it again?<br>0 = no,<br>1 = yes | <i>(if you completely abandoned it on all your plots): In which year did you stop using it?</i> |
| 1    | Living barriers           |                    |                                                 | Meters   |                                                                                                       |                                                                                                                   |                                                       |                                                                                                 |
| 2    | Terraces or stone walls   |                    |                                                 | Meters   |                                                                                                       |                                                                                                                   |                                                       |                                                                                                 |
| 3    | Hillside ditches          |                    |                                                 | Meters   |                                                                                                       |                                                                                                                   |                                                       |                                                                                                 |
| 4    | Contour farming           |                    |                                                 | Manzanas |                                                                                                       |                                                                                                                   |                                                       |                                                                                                 |
| 5    | Minimum tillage           |                    |                                                 | Manzanas |                                                                                                       |                                                                                                                   |                                                       |                                                                                                 |
| 6    | Mulching                  |                    |                                                 | Manzanas |                                                                                                       |                                                                                                                   |                                                       |                                                                                                 |
| 7    | Green manure (cover crop) |                    |                                                 | Manzanas |                                                                                                       |                                                                                                                   |                                                       |                                                                                                 |
| 8    | Organic fertilizer        |                    |                                                 | Quintals |                                                                                                       |                                                                                                                   |                                                       |                                                                                                 |
| 9    | Crop rotation             |                    |                                                 | Manzanas |                                                                                                       |                                                                                                                   |                                                       |                                                                                                 |
| 10   | No-burning                |                    |                                                 |          |                                                                                                       |                                                                                                                   |                                                       |                                                                                                 |
| 11   | Other:                    |                    |                                                 |          |                                                                                                       |                                                                                                                   |                                                       |                                                                                                 |

Table 4.2) *(If you abandoned any practice, write the practice code here and indicate why you abandoned it.)*

| Practice that you have used but abandoned <i>(use the code of the previous table)</i> | Why did you abandon it...?<br>(a) |
|---------------------------------------------------------------------------------------|-----------------------------------|
|                                                                                       |                                   |
|                                                                                       |                                   |
|                                                                                       |                                   |
|                                                                                       |                                   |

(a) 1 = too much work, 2 = increases pests, 3 = increases weeds, 4 = too expensive, 5 = doesn't have an effect on the soil, 6= decreases soil fertility, 7 = decreases crop productivity, 8 = is not profitable, 9 = there are more important tasks, 10 = I don't have enough information on how to use it, 11 = other *(specify!)*

Table 4.3) Fill out a row on the following table for each practice that you use or have ever used (even if you don't use it anymore)

| Code |                           | When did you establish or use this practice for the first time? (year) | Where did you hear about this practice for the first time? (a) | Did you receive assistance to establish or use this practice?<br>0 = no,<br>1 = yes | If yes:<br>From whom?<br>(a) | Did you receive a financial incentive?<br>0 = no,<br>1 = yes | If yes:<br>What did you receive?<br>1 = money,<br>2 = food,<br>3 = materials,<br>4 = other<br>(specify) | Do you still receive technical assistance regarding this practice?<br>0 = no, 1=yes | What is the current state?<br>1 = good,<br>2 = regular,<br>3 = bad,<br>4 = the practice is not being used anymore |
|------|---------------------------|------------------------------------------------------------------------|----------------------------------------------------------------|-------------------------------------------------------------------------------------|------------------------------|--------------------------------------------------------------|---------------------------------------------------------------------------------------------------------|-------------------------------------------------------------------------------------|-------------------------------------------------------------------------------------------------------------------|
| 1    | Living barriers           |                                                                        |                                                                |                                                                                     |                              |                                                              |                                                                                                         |                                                                                     |                                                                                                                   |
| 2    | Terraces or stone walls   |                                                                        |                                                                |                                                                                     |                              |                                                              |                                                                                                         |                                                                                     |                                                                                                                   |
| 3    | Hillside ditches          |                                                                        |                                                                |                                                                                     |                              |                                                              |                                                                                                         |                                                                                     |                                                                                                                   |
| 4    | Contour farming           |                                                                        |                                                                |                                                                                     |                              |                                                              |                                                                                                         |                                                                                     |                                                                                                                   |
| 5    | Minimum tillage           |                                                                        |                                                                |                                                                                     |                              |                                                              |                                                                                                         |                                                                                     |                                                                                                                   |
| 6    | Mulching                  |                                                                        |                                                                |                                                                                     |                              |                                                              |                                                                                                         |                                                                                     |                                                                                                                   |
| 7    | Green manure (cover crop) |                                                                        |                                                                |                                                                                     |                              |                                                              |                                                                                                         |                                                                                     |                                                                                                                   |
| 8    | Organic fertilizer        |                                                                        |                                                                |                                                                                     |                              |                                                              |                                                                                                         |                                                                                     |                                                                                                                   |
| 9    | Crop rotation             |                                                                        |                                                                |                                                                                     |                              |                                                              |                                                                                                         |                                                                                     |                                                                                                                   |
| 10   | No-burning                |                                                                        |                                                                |                                                                                     |                              |                                                              |                                                                                                         |                                                                                     |                                                                                                                   |
| 11   | Other:                    |                                                                        |                                                                |                                                                                     |                              |                                                              |                                                                                                         |                                                                                     |                                                                                                                   |

(a) 1 = own experimentation, 2 = family, 3 = friends, 4 = neighbors, 5 = producers' association, 6 = cooperative promoter, 7 = Promoter of a development or cooperation project, 8 = promoter of an NGO, 9 = field school, 10 = other (specify)

Table 4.4) How do you think that the following practice affects... (Use the code: 1 = increases, 2 = remains the same, 3 = decreases)

| Code |                           | the availability of land for agricultural production | the workforce required on the farm | the soil fertility | the water availability in the soil | the growth of weeds | the incidence of pests | the crop's productivity | The variability in production output | the crop's profitability |
|------|---------------------------|------------------------------------------------------|------------------------------------|--------------------|------------------------------------|---------------------|------------------------|-------------------------|--------------------------------------|--------------------------|
| 1    | Living barriers           |                                                      |                                    |                    |                                    |                     |                        |                         |                                      |                          |
| 2    | Terraces or stone walls   |                                                      |                                    |                    |                                    |                     |                        |                         |                                      |                          |
| 3    | Hillside ditches          |                                                      |                                    |                    |                                    |                     |                        |                         |                                      |                          |
| 4    | Contour farming           |                                                      |                                    |                    |                                    |                     |                        |                         |                                      |                          |
| 5    | Minimum tillage           |                                                      |                                    |                    |                                    |                     |                        |                         |                                      |                          |
| 6    | Mulching                  |                                                      |                                    |                    |                                    |                     |                        |                         |                                      |                          |
| 7    | Green manure (cover crop) |                                                      |                                    |                    |                                    |                     |                        |                         |                                      |                          |
| 8    | Organic fertilizer        |                                                      |                                    |                    |                                    |                     |                        |                         |                                      |                          |
| 9    | Crop rotation             |                                                      |                                    |                    |                                    |                     |                        |                         |                                      |                          |
| 10   | No-burning                |                                                      |                                    |                    |                                    |                     |                        |                         |                                      |                          |
| 11   | Other:                    |                                                      |                                    |                    |                                    |                     |                        |                         |                                      |                          |

4.5) Choose the option that best describes you and your opinion:

When seeing or hearing about a new agricultural practice, you usually like to implement it on your farm:

- 1) Immediately, as long as I have enough information to know how
- 2) After having observed it on other farms for an extended time period
- 3) Only when help and assistance to implement it are offered
- 4) Normally I am not interested in implementing new practices

4.6) Choose the option that applies most to you:

- 1) I think that the agricultural practices that I have always used on my farm are good for me and there is no need to learn new practices
- 2) In general I am satisfied with the practices that I use on my land, but sometimes changes have to be made
- 3) I love experimenting with new practices on my farm always looking for a way to improve production

4.7) How do you describe your attitude towards technical assistance:

- 1) It promotes very useful practices that help to improve production
- 2) I am always interested to see what they promote and whether it is useful for me
- 3) I don't think it is very important to participate in these groups and training sessions
- 4) I think that what is being promoted doesn't apply for my farm, it is for other people
- 5) I am not interested in any new practices in general

4.8) How do you think would the use of sustainable agricultural practices on your land affect ...

- |                                               |                |                    |                |
|-----------------------------------------------|----------------|--------------------|----------------|
| 1) the agricultural productivity of your land | (0) positively | (1) doesn't affect | (2) negatively |
| 2) the family's health                        | (0) positively | (1) doesn't affect | (2) negatively |
| 3) the productivity of neighboring plots      | (0) positively | (1) doesn't affect | (2) negatively |
| 4) the natural resources of the community     | (0) positively | (1) doesn't affect | (2) negatively |
| 5) the global environment                     | (0) positively | (1) doesn't affect | (2) negatively |

|  |
|--|
|  |
|  |
|  |
|  |
|  |

4.9) What do you think is your neighbors' attitude towards someone who uses agricultural conservation practices on his/her land:

- (1) They very much appreciate that person for using new practices
- (2) They are very interested to see if it works and they thank that person for implementing these practices
- (3) They don't care what practices one uses, they don't think highly nor badly of the person
- (4) They are very critical and would most likely criticize that person
- (5) They think badly of that person and laugh at him/her



**Section 5: Commercialization of the farm’s agricultural products**

Table 5.1) Which crops did you sell during the last agricultural year? (*Ask about all the crops that appear in 3.6*)

**Note: Do not include coffee here!**

| Crop (a) | In which market or to whom did you sell it? (b) | Since when do you sell there? (years) | You sell the product as...<br>(1) conventional<br>(2) organic<br>(3) other ( <i>specify</i> ) | <i>If it is organic:</i><br>Since when do you sell it as organic? (years) | How much did you sell in this market? | Unit (c) | <i>If the unit is 4 or 5:</i><br><br>Of what capacity? | How much did you get... |                             |
|----------|-------------------------------------------------|---------------------------------------|-----------------------------------------------------------------------------------------------|---------------------------------------------------------------------------|---------------------------------------|----------|--------------------------------------------------------|-------------------------|-----------------------------|
|          |                                                 |                                       |                                                                                               |                                                                           |                                       |          |                                                        | Per unit (Lmp)          | <b>or</b><br>in total (Lmp) |
|          |                                                 |                                       |                                                                                               |                                                                           |                                       |          |                                                        |                         |                             |
|          |                                                 |                                       |                                                                                               |                                                                           |                                       |          |                                                        |                         |                             |
|          |                                                 |                                       |                                                                                               |                                                                           |                                       |          |                                                        |                         |                             |
|          |                                                 |                                       |                                                                                               |                                                                           |                                       |          |                                                        |                         |                             |
|          |                                                 |                                       |                                                                                               |                                                                           |                                       |          |                                                        |                         |                             |
|          |                                                 |                                       |                                                                                               |                                                                           |                                       |          |                                                        |                         |                             |
|          |                                                 |                                       |                                                                                               |                                                                           |                                       |          |                                                        |                         |                             |
|          |                                                 |                                       |                                                                                               |                                                                           |                                       |          |                                                        |                         |                             |
|          |                                                 |                                       |                                                                                               |                                                                           |                                       |          |                                                        |                         |                             |
|          |                                                 |                                       |                                                                                               |                                                                           |                                       |          |                                                        |                         |                             |
|          |                                                 |                                       |                                                                                               |                                                                           |                                       |          |                                                        |                         |                             |
|          |                                                 |                                       |                                                                                               |                                                                           |                                       |          |                                                        |                         |                             |
|          |                                                 |                                       |                                                                                               |                                                                           |                                       |          |                                                        |                         |                             |
|          |                                                 |                                       |                                                                                               |                                                                           |                                       |          |                                                        |                         |                             |
|          |                                                 |                                       |                                                                                               |                                                                           |                                       |          |                                                        |                         |                             |
|          |                                                 |                                       |                                                                                               |                                                                           |                                       |          |                                                        |                         |                             |
|          |                                                 |                                       |                                                                                               |                                                                           |                                       |          |                                                        |                         |                             |
|          |                                                 |                                       |                                                                                               |                                                                           |                                       |          |                                                        |                         |                             |
|          |                                                 |                                       |                                                                                               |                                                                           |                                       |          |                                                        |                         |                             |

- (a) Crop code (*Note: code 1 and 2 for coffee don't apply here*)
- (b) 1 = in the community, 2 = in Marcala, 3 = in other town, 4 = in Teguz, San Pedro, Comayagua or other bigger city,  
5 = small trader, 6 = Hortifruti, 7 = RedComal, 8 = COMUCAP, 9 = other cooperative, 10 = microenterprise, 11 =other (*specify*)
- (c) 1 = pound, 2 = quintal, 3 = unit, 4 = bag of ..., 5 = box of ..., 6 = bottle of 365 ml, 7 = liter, 8 = other (*specify*)

Table 5.2) (Only if the producer has coffee) Coffee commercialization

| Type of coffee           | Has coffee..?<br>0=no,<br>1=yes | How much of this type did you sell? | Unit (a) | How did you sell it?<br>(1) as cherry<br>(2) dry parchment<br>(3) wet parchment | Who did you sell it to? (b) | How much did you get |             | Since when have you produced this coffee? (year) |
|--------------------------|---------------------------------|-------------------------------------|----------|---------------------------------------------------------------------------------|-----------------------------|----------------------|-------------|--------------------------------------------------|
|                          |                                 |                                     |          |                                                                                 |                             | Per unit             | or in total |                                                  |
| Conventional             |                                 |                                     |          |                                                                                 |                             |                      |             |                                                  |
| Organic                  |                                 |                                     |          |                                                                                 |                             |                      |             |                                                  |
| In transition to organic |                                 |                                     |          |                                                                                 |                             |                      |             |                                                  |
| Sustainable              |                                 |                                     |          |                                                                                 |                             |                      |             |                                                  |
| Fair trade               |                                 |                                     |          |                                                                                 |                             |                      |             |                                                  |
| other:                   |                                 |                                     |          |                                                                                 |                             |                      |             |                                                  |

(a) 1 =pound, 2 = quintal

(b) 1 = small trader, 2 = COMUCAP, 3= RAOS, 4 = Caruchil, 5 = other (*specify*)

**Section 6: Technical assistance**

6.1) Have you or any member of your family participated in a field school? 0 = no, 1 = yes (*No → go to table 6.4*)

*If the answer is yes:*

6.2) When did you participate (for the first time)? (year): \_\_\_\_\_

6.2a) Are you still participating? 0 = no, 1 = yes (*Yes → go to table 6.4*)

*If he/she doesn't participate anymore:*

6.3) When did you stop participating? (year): \_\_\_\_\_

6.3a) Why did you stop participating?

- (1) the field school ended      (4) the topic wasn't interesting  
 (2) you didn't get along with the group      (5) you didn't have time anymore  
 (3) you didn't learn anything new      (6) other (*specify*): \_\_\_\_\_

Table 6.4) (*Indicate only the main source (if there are two main sources you can indicate both)!*)

|                                                                                              | 1. | 2. |
|----------------------------------------------------------------------------------------------|----|----|
| With whom do you talk about agricultural practices?                                          |    |    |
| From whom do you receive information about new agricultural practices?                       |    |    |
| From whom do you receive information about prices of agricultural products that you produce? |    |    |
| From whom do you receive information about new market opportunities?                         |    |    |

Code: 1 = family, 2 = friends, 3 = neighbors, 4 = group of producers, 5 = cooperative, 6 = promoter, 7 = TV, 8 = radio, 9 = newspaper, 10 = nobody/ I don't have information

Table 6.5) During the last agricultural year, have you or any member of the household been assisted in the following topics? (*Read the list and fill out a row for each topic on which any member of the household has been assisted*)

| Code |                                                 | 0 = no,<br>1 = yes | Gender of the member of the family that has been assisted:<br>0 = M, 1 = F,<br>2 = both | What kind of training?<br>(0 = no, 1 = yes) |                    |              | How often where you assisted during the last year?<br>(a) | From how many organizations did you get assistance on this topic during the last year? | Name(s) of the organization(s)?<br>(b)<br>(if there are many, write down the most important three!)<br>1. 2. 3. |  |  |
|------|-------------------------------------------------|--------------------|-----------------------------------------------------------------------------------------|---------------------------------------------|--------------------|--------------|-----------------------------------------------------------|----------------------------------------------------------------------------------------|-----------------------------------------------------------------------------------------------------------------|--|--|
|      |                                                 |                    |                                                                                         | Visits from extension workers               | Field trips, talks | Field school |                                                           |                                                                                        |                                                                                                                 |  |  |
| 1    | Coffee production                               |                    |                                                                                         |                                             |                    |              |                                                           |                                                                                        |                                                                                                                 |  |  |
| 2    | Vegetable production                            |                    |                                                                                         |                                             |                    |              |                                                           |                                                                                        |                                                                                                                 |  |  |
| 3    | Fruit production                                |                    |                                                                                         |                                             |                    |              |                                                           |                                                                                        |                                                                                                                 |  |  |
| 4    | Ornamental or medicinal plants production       |                    |                                                                                         |                                             |                    |              |                                                           |                                                                                        |                                                                                                                 |  |  |
| 5    | Soil conservation practices                     |                    |                                                                                         |                                             |                    |              |                                                           |                                                                                        |                                                                                                                 |  |  |
| 6    | Water conservation practices                    |                    |                                                                                         |                                             |                    |              |                                                           |                                                                                        |                                                                                                                 |  |  |
| 7    | Organic production                              |                    |                                                                                         |                                             |                    |              |                                                           |                                                                                        |                                                                                                                 |  |  |
| 8    | Integrated pest management                      |                    |                                                                                         |                                             |                    |              |                                                           |                                                                                        |                                                                                                                 |  |  |
| 9    | Post-harvest management                         |                    |                                                                                         |                                             |                    |              |                                                           |                                                                                        |                                                                                                                 |  |  |
| 10   | Practices to improve the quality of the product |                    |                                                                                         |                                             |                    |              |                                                           |                                                                                        |                                                                                                                 |  |  |
| 11   | Commercialization of agricultural products      |                    |                                                                                         |                                             |                    |              |                                                           |                                                                                        |                                                                                                                 |  |  |
| 12   | Farm management                                 |                    |                                                                                         |                                             |                    |              |                                                           |                                                                                        |                                                                                                                 |  |  |
| 13   | Group organization                              |                    |                                                                                         |                                             |                    |              |                                                           |                                                                                        |                                                                                                                 |  |  |
| 14   | Administration of rural credit association      |                    |                                                                                         |                                             |                    |              |                                                           |                                                                                        |                                                                                                                 |  |  |
| 15   | Political empowerment                           |                    |                                                                                         |                                             |                    |              |                                                           |                                                                                        |                                                                                                                 |  |  |
| 16   | Other:                                          |                    |                                                                                         |                                             |                    |              |                                                           |                                                                                        |                                                                                                                 |  |  |

(a) 1 = weekly, 2 = bi-weekly, 3 = monthly, 4 = several times a year (but less than 12 times), 5 = once or twice a year

(b) 1 = COMUCAP, 2 = APAS, 3 = APROCAMP, 4 = Fundación Banhcafé, 5 = APROCAFE, 6 = CNTC, 7 = RAOS, 8 = ADRO, 9 = FUNDER, 10 = ONIL, 11 = COPIN, 12 = Programa Binacional, 13 = C.D.M., 14 = Caritas, 15 = PRODASMA, 16 = PICIL, 17 = Unidad para progresar, 18 = Mujeres de la Sierra, 19 = other (*specify*)

### **Section 7: Local organizations**

Table 7.1) Please name all the organizations or groups in which you or any member of this household participate, including producers' associations, cooperatives, credit, church or community institutions.

(Note: Write down the names of all the organizations and then fill out a line for each organization in which at least one member of the household participates)

| Code | In which organization or local group do you participate?<br>(Note: if it is a grassroots group, write down the name of the organization, not the group!) | Type of organization<br>(a) | Do you regularly participate in the assemblies?<br>(b) | Can the members participate in the decision-making?<br>0 = no, 1 = yes | How often are you in contact with the organization? (c) | In what area does the organization mainly support you?<br>(d) |    |    | Does any member of the household have a special role in this organization?<br>0 = no, 1 = yes | If yes: Which role?<br>(e) |
|------|----------------------------------------------------------------------------------------------------------------------------------------------------------|-----------------------------|--------------------------------------------------------|------------------------------------------------------------------------|---------------------------------------------------------|---------------------------------------------------------------|----|----|-----------------------------------------------------------------------------------------------|----------------------------|
|      |                                                                                                                                                          |                             |                                                        |                                                                        |                                                         | 1.                                                            | 2. | 3. |                                                                                               |                            |
| 1    |                                                                                                                                                          |                             |                                                        |                                                                        |                                                         |                                                               |    |    |                                                                                               |                            |
| 2    |                                                                                                                                                          |                             |                                                        |                                                                        |                                                         |                                                               |    |    |                                                                                               |                            |
| 3    |                                                                                                                                                          |                             |                                                        |                                                                        |                                                         |                                                               |    |    |                                                                                               |                            |
| 4    |                                                                                                                                                          |                             |                                                        |                                                                        |                                                         |                                                               |    |    |                                                                                               |                            |
| 5    |                                                                                                                                                          |                             |                                                        |                                                                        |                                                         |                                                               |    |    |                                                                                               |                            |
| 6    |                                                                                                                                                          |                             |                                                        |                                                                        |                                                         |                                                               |    |    |                                                                                               |                            |
| 7    |                                                                                                                                                          |                             |                                                        |                                                                        |                                                         |                                                               |    |    |                                                                                               |                            |
| 8    |                                                                                                                                                          |                             |                                                        |                                                                        |                                                         |                                                               |    |    |                                                                                               |                            |
| 9    |                                                                                                                                                          |                             |                                                        |                                                                        |                                                         |                                                               |    |    |                                                                                               |                            |
| 10   |                                                                                                                                                          |                             |                                                        |                                                                        |                                                         |                                                               |    |    |                                                                                               |                            |
| 11   |                                                                                                                                                          |                             |                                                        |                                                                        |                                                         |                                                               |    |    |                                                                                               |                            |
| 12   |                                                                                                                                                          |                             |                                                        |                                                                        |                                                         |                                                               |    |    |                                                                                               |                            |

(a) 1 = cooperative, 2 = Producers' association, 3 = NGO or cooperation program, 4 = rural development committee, 5 = rural credit association, credit institution, 6 = church or religious group, 7 = social or political incidence group, 8 = other (*specify*)

(b) 0 = no, 1 = yes, 2 = sometimes, 3 = there are no assemblies

(c) 1 = daily, 2 = several times a week, 3 = weekly, 4 = bi-weekly, 5 = monthly, 6 = several times a year (but less than 12 times), 7 = once or twice a year

(d) 1 = Technical assistance in agricultural/livestock production, 2 = commercialization of agricultural products, 3 = processing of agricultural products, 4 = resources conservation, like soil and water, 5 = farm diversification, 6 = micro-enterprise development  
7 = farm or micro-enterprise management, 8 = credit, 9 = health and nutrition, 10 = political empowerment, 11 = community's development and infrastructure, 12 = other (*specify*)

(e) 1 = president, 2 = board of directors, 3 = coordinator, 4 = technician, 5 = promoter, 6 = lead farmer, 7 = other (*specify*)

**Section 8: Other income activities**

Table 8.1) Besides the cropping activities, what other income generating activities do the members of the household have?

| Code | What kind of job?<br>(the codes can be repeated!)<br>(a) | What category or product?<br>(without code!) | How many members of the household work on this activity? | On average, the members of the household work in this activity, for how many ... |                   |                    | What is the income generated by this activity... |              | Who disposes of the money from this activity?<br>(b) |
|------|----------------------------------------------------------|----------------------------------------------|----------------------------------------------------------|----------------------------------------------------------------------------------|-------------------|--------------------|--------------------------------------------------|--------------|------------------------------------------------------|
|      |                                                          |                                              |                                                          | ...hours per day?                                                                | ...days per week? | ...weeks per year? | Per day?                                         | or per year? |                                                      |
| 1    |                                                          |                                              |                                                          |                                                                                  |                   |                    |                                                  |              |                                                      |
| 2    |                                                          |                                              |                                                          |                                                                                  |                   |                    |                                                  |              |                                                      |
| 3    |                                                          |                                              |                                                          |                                                                                  |                   |                    |                                                  |              |                                                      |
| 4    |                                                          |                                              |                                                          |                                                                                  |                   |                    |                                                  |              |                                                      |
| 5    |                                                          |                                              |                                                          |                                                                                  |                   |                    |                                                  |              |                                                      |
| 6    |                                                          |                                              |                                                          |                                                                                  |                   |                    |                                                  |              |                                                      |
| 7    |                                                          |                                              |                                                          |                                                                                  |                   |                    |                                                  |              |                                                      |

(a) Ask about the following activities: 1 = livestock sector (fishing, bee keeping...), 2 = processing of agricultural products, 3 = other type of micro-enterprise, 4 = day laborer, 5 = trade (retail/ wholesale), 6 = service provision, 7 = construction, 8 = transport, 9 = wage labor, 10 = other (specify)

(b) (1) the head of the household, (2) the spouse of the head of the household, (3) both, (4) the son/daughter, (5) someone else, (6) the whole family

8.2) During the last agricultural year, which activity generated most income to your family? \_\_\_\_\_

8.3) Compare the income generated by the farm with the income generated by the activities outside of the farm:

- (1) In the case of your family, the **activities of the farm** generate more income
- (2) In the case of your family, the activities of the farm and outside of the farm generate more or less the same
- (3) In the case of your family, the activities **outside the farm** generate more income

8.4) which do you consider more important for your family in the long run:

- (1) The activities of the farm
- (2) The activities outside of the farm
- (3) Both

**Section 9: Credit**

9.1) Do you have a checking account (savings account)? (0) no (1) yes

Table 9.2) Did your family obtain a loan during the last agricultural year? (0) No (1) Yes  (If yes → Fill out the following table)

|   | Source (a) | Amount of the obtained loan | When did you get the loan? (month) | What is the loan term? | Have you done partial payments? 0 = no, 1 = yes | (If yes:)                       | How often do you get loans from this institution? | Is this loan used in the farm? 0 = no, 1 = yes |
|---|------------|-----------------------------|------------------------------------|------------------------|-------------------------------------------------|---------------------------------|---------------------------------------------------|------------------------------------------------|
|   |            |                             |                                    |                        |                                                 | How much have you already paid? |                                                   |                                                |
| 1 |            |                             |                                    |                        |                                                 |                                 |                                                   |                                                |
| 2 |            |                             |                                    |                        |                                                 |                                 |                                                   |                                                |
| 3 |            |                             |                                    |                        |                                                 |                                 |                                                   |                                                |
| 4 |            |                             |                                    |                        |                                                 |                                 |                                                   |                                                |
| 5 |            |                             |                                    |                        |                                                 |                                 |                                                   |                                                |

(a): (1) bank (2) rural credit association (3) producers' association (4) trader (5) cooperative (6) relative (7) friend (8) other people

| 9.3) When your family really needs money, what do you think is the highest amount that you could get as a loan... | Loan amount |
|-------------------------------------------------------------------------------------------------------------------|-------------|
| From the bank                                                                                                     |             |
| From the rural credit association                                                                                 |             |
| From the producers' association                                                                                   |             |
| From the trader                                                                                                   |             |
| From the cooperative                                                                                              |             |
| From a relative, friend or someone else                                                                           |             |
| other (specify)                                                                                                   |             |

9.4) Do you need more credit than what you already have? (0) no (1) yes

9.5) If yes, why don't you take out more credit?

- |                                             |                                          |                          |
|---------------------------------------------|------------------------------------------|--------------------------|
| (1) You don't receive more credit           | (4) You don't want to acquire debt       | <input type="checkbox"/> |
| (2) You don't know who could lend you money | (5) You can't repay another loan         |                          |
| (3) The interest rate is too high           | (6) You will soon take out what you need |                          |

**Section 10: Goods and consumption**

|                                                                                                                                                                                                                                                       |                                                                                                                                                                                                                                                                                                                         |
|-------------------------------------------------------------------------------------------------------------------------------------------------------------------------------------------------------------------------------------------------------|-------------------------------------------------------------------------------------------------------------------------------------------------------------------------------------------------------------------------------------------------------------------------------------------------------------------------|
| <p>10.1) How many rooms does your house have? (including rooms besides the construction that belong to the same household) :</p> <p style="text-align: right;"><input type="text"/></p>                                                               | <p>10.4) Of what material is the roof?</p> <p>(1) grass thatch<br/>(2) wood<br/>(3) zinc sheet<br/>(4) asbestos sheet<br/>(5) shingles</p> <p style="text-align: right;"><input type="text"/></p>                                                                                                                       |
| <p>10.2) Of what material are the outer walls of the house?</p> <p>(1) loam and wood<br/>(2) wood<br/>(3) adobe<br/>(4) cement blocks<br/>(5) blocks with coating (lime or cement coating)</p> <p style="text-align: right;"><input type="text"/></p> | <p>10.5) What material do you mostly use for cooking?</p> <p>(1) Gathered firewood<br/>(2) Bought firewood<br/>(3) Oil (kerosene)<br/>(4) Gas<br/>(5) Electric stove</p> <p style="text-align: right;"><input type="text"/></p>                                                                                         |
| <p>10.3) Of what material is the floor?</p> <p>(1) Soil<br/>(2) Wood<br/>(2) Cement<br/>(3) Cement with tiles<br/>(4) Mosaic<br/>(5) Ceramic</p> <p style="text-align: right;"><input type="text"/></p>                                               | <p>10.6) Where do you obtain the drinking water (<i>choose the main source</i>)?</p> <p>(1) Water from the rain, dam, pond, river<br/>(2) Spring<br/>(3) Public well<br/>(4) Well in the house<br/>(5) Drinking water truck<br/>(6) Drinking water from pipe</p> <p style="text-align: right;"><input type="text"/></p> |

|                                                                                                                                                                                                      |                                                                                                                                                           |
|------------------------------------------------------------------------------------------------------------------------------------------------------------------------------------------------------|-----------------------------------------------------------------------------------------------------------------------------------------------------------|
| <p><i>Only for the interviewer:</i></p>                                                                                                                                                              |                                                                                                                                                           |
| <p>10.7) In general, in what conditions is the house?</p> <p>(1) Seriously damaged<br/>(2) Needs minor repairs<br/>(3) In good conditions</p> <p style="text-align: right;"><input type="text"/></p> | <p>10.8) What do you think about the house?</p> <p>(1) humble<br/>(2) normal<br/>(3) luxurious</p> <p style="text-align: right;"><input type="text"/></p> |

|                                                                                            |                        |
|--------------------------------------------------------------------------------------------|------------------------|
|                                                                                            | <p>0 = no, 1 = yes</p> |
| <p>10.9) Do you have electricity?</p>                                                      |                        |
| <p>10.10) Does any member of the household have social security or retirement pension?</p> |                        |
| <p>10.11) Do you have telephone?</p>                                                       |                        |
| <p>10.12) Does any member of the household have a cell phone?</p>                          |                        |
| <p>10.13) Is there a computer in the house?</p>                                            |                        |

|                                                                                                                                                                                                                                                                                                                                                                                    |                                                                                                                                                                                              |
|------------------------------------------------------------------------------------------------------------------------------------------------------------------------------------------------------------------------------------------------------------------------------------------------------------------------------------------------------------------------------------|----------------------------------------------------------------------------------------------------------------------------------------------------------------------------------------------|
| 10.14) Did you have any party or guests during the last two days? 0 = no, 1 = yes <input type="checkbox"/><br>14a) <i>If no:</i> How many meals were served to the members of the household during the last two days <input type="checkbox"/><br>14b) <i>If yes:</i> How many meals were served to the members of the household during the last two days before the special event? | 10.20) And the tortillas? Do you...<br>1 = buy the tortillas already made<br>2 = buy the flour <input type="checkbox"/><br>3 = buy the corn<br>4 = use mainly the corn produced on your farm |
| 10.15) Did you have any party or guests during the last week? 0 = no, 1 = yes <input type="checkbox"/><br><i>(if yes, the following 4 questions refer to the week before the special event!)</i>                                                                                                                                                                                   | 10.21) For how many weeks do you <u>have</u> beans in storage? <input type="checkbox"/><br>10.22) For how many weeks do you <u>have</u> corn in storage? <input type="checkbox"/>            |
| 10.16) During the last week, how many days did you <u>serve</u> beef in your house? <input type="checkbox"/>                                                                                                                                                                                                                                                                       | 10.23) During the last month, how many days was there not enough food for all the members of the household? <input type="checkbox"/>                                                         |
| 10.17) During the last week, how many days did you <u>serve</u> pork in your house? <input type="checkbox"/>                                                                                                                                                                                                                                                                       |                                                                                                                                                                                              |
| 10.18) During the last week, how many days did you <u>serve</u> chicken in your house? <input type="checkbox"/>                                                                                                                                                                                                                                                                    | 10.24) During the last year, in how many months, was there at least one day in which there was not enough food to feed all the members of the household? <input type="checkbox"/>            |
| 10.19) During the last week, how many days did you <u>not</u> eat any kind of meat in your meals? <input type="checkbox"/>                                                                                                                                                                                                                                                         |                                                                                                                                                                                              |

Table 10.25) Number and value of the goods of the household

|                                   | How many do you have? | <i>(if any:)</i> |                              |
|-----------------------------------|-----------------------|------------------|------------------------------|
|                                   |                       | Value (re-sale)  | In total (0) or per unit (1) |
| <b>Livestock</b>                  |                       |                  |                              |
| 1) Cows and oxen                  |                       |                  |                              |
| 2) Pigs and goats                 |                       |                  |                              |
| 3) Chicken and rabbits            |                       |                  |                              |
| 4) Horses and donkeys             |                       |                  |                              |
| <b>Transport</b>                  |                       |                  |                              |
| 5) Cars                           |                       |                  |                              |
| 6) Truck or pick-up truck         |                       |                  |                              |
| 7) Tractor                        |                       |                  |                              |
| 8) Motorcycles                    |                       |                  |                              |
| 9) Bicycles                       |                       |                  |                              |
| 10) Carts                         |                       |                  |                              |
| 11) Other vehicles                |                       |                  |                              |
| <b>Electrical appliances</b>      |                       |                  |                              |
| 12) Televisions                   |                       |                  |                              |
| 13) Video cassette recorder (VCR) |                       |                  |                              |
| 14) Sound equipments/ radios      |                       |                  |                              |
| 15) Refrigerators                 |                       |                  |                              |
| 16) Electric or gas stove         |                       |                  |                              |
| 17) Microwave oven                |                       |                  |                              |
| 18) Washing machines              |                       |                  |                              |
| 19) Fans                          |                       |                  |                              |
